# Supplementary material for: Genome-wide analysis of bZIP transcription factors and their expression patterns in response to methyl jasmonate and low-temperature stresses in Platycodon grandiflorus
Source: PeerJ. 2024 Apr 30;12:e17371. doi: 10.7717/peerj.17371 (PMC11067905; doi:10.7717/peerj.17371)
Supplement: Supplemental Information 2 [file peerj-12-17371-s002.xlsx]

## Sheet: Sheet1
Supplementary Table S1. Primers used for RT-qPCR analysis
Gene Name	Forward Primer (5'to 3')	Reverse Primer (5'to 3')
PgbZIP003	TCCGTGTCACCTGCTCCTTAC	TTCTCCTCTGTCTCCGCTCAAC
PgbZIP005	AGCCTATTCAGCAGCAGCCATTC	CACTAACACCGCCACCACCTAATC
PgbZIP011	CGGAGAAATGTCAGGCGGTTCAG	GGGCTGGTCGGGTTGTTGTTG
PgbZIP019	GCCAAGATAATCAAGCGACAGGAG	CATCAATCTGGTCCGTGCTCTG
PgbZIP021	TGGCGAGTCATAGAGTTGGAGAGG	ACTGCGTGAGGGAGGTGGTG
PgbZIP022	AGTCATCAAGCGTGAAGGGAACAAG	GCAAGCCTCCTCAGTGTCTTTGG
PgbZIP024	TGCTGCCAAGGCTGATGTGTTC	CTCCGTTAGAGGCTCCAACTGATTC
PgbZIP032	AAGGGTTCATGCGTCTCGTTGTAC	CATCCTCTTGCGTTTCCTCTCGTC
PgbZIP042	GATGCCGTGCCCGCCTTATG	TTCCTAGCCTCCGTCTTCTTAGCC
PgbZIP046	GGCGACTATTCAGGCATTCTACAG	TGCGTGAGGAGGAACATGACC
