# Supplementary material for: Genome-wide analysis of bZIP transcription factors and their expression patterns in response to methyl jasmonate and low-temperature stresses in Platycodon grandiflorus
Source: PeerJ. 2024 Apr 30;12:e17371. doi: 10.7717/peerj.17371 (PMC11067905; doi:10.7717/peerj.17371)
Supplement: Supplemental Information 3 [file peerj-12-17371-s003.xlsx]

## Sheet: Sheet1
Table S2. The amino acid sequences of 75 bZIPs from P. grandiflorus
Gene Name	Sequence
PgbZIP001	MASSKLMASSTSRNSDLIRRRSSSSSSTKLSSISELSNHIQRRPTTSSSTNTTTNYFEPMTVDGLLRNVYVDNNEASESTLLDAEITLLDAAGAVTPISDNDANGAIRRQEIVSSVNGGNKTVDDVWKEIVAGRSCKQEVPDEMMTLEDFLAKAGAVDEEDVKVVPQPLLTERLSGGIYTYDSLPVPVAVDGALGFGNGVEAIGGRGKRRAILEPLDKAAQQRQRRMIKNRESAARSRERKQAYQIELESLAVKLEEEHEMLLKEKAERTKERFKQLMENIIPVVEKRRPARVLKRVRSMQW
PgbZIP002	MASSKVMASTSPANPDLPRQSSIHSLTLSELQTDPSKNFGSMNMDELLKNIYADSEAFPAAGEGGARGNGVGLTSQGSFSLPKSMGNKTVDEVWKEIVSGSSDNREPEMTLEDFLTKAGAVREEDVRLSAVAPVPGYALDSIINAPQFQAPGLNMQSAASAPGGFGIDSVGFGNGIVALGAPAAGGGSVRGKRRAVEEPPVDRATQQKQRRMIKNRESAARSRERKQAYTVELESLVTQLEEENARLMREEEEQTRERFKQLMENLIPVVEKRRPPRVLRRTNSL
PgbZIP003	MNMNFKNFGNERLQMDGGVGSGQPPGNFPLVRQGSIYSLTFDELQSTMGSVGKDFGSMNMDELLKNIWNAEETQTMGNNTSGAQDRGVPGGHLQRQGSLTLPRTLSQKTVDEVWKDIAKEYNSGFGESSFQQQRQQTLGEMTLEEFLVKAGVVWEETQVAGKPIDTGLFGNLPNSQNNSSFGIGFQQPIRNTGVMGNRIPENGNGIAFQSANLPLSVNGVRSTQQHQSQMQQQQQQSQQQQLFPKQPTLAYGAPMPIPSNSQLASPGIRGGIMGHSDPVMNGNLVSSAALQGGGLGVVSLGGGAVTVANGSPALSSDGIGKSNGDTSSVSPAPYVFNGVLRGRKCSAVEKVVERRQRRMIKNRESAARSRARKQAYTMELEAEVAKLKEQNQELLKKQE…
PgbZIP004	MGTQTMGSSGGGSGTQEPKSDSLARQSSLYNLTLDEVQHQLGDLGKPLSSMNLDELLKSVWTAEANQGVVGGVDYVQQGQLASASSLYQQSSLTLNRDLSKKTVDEVWQDIQQGQRKRSNSNIDRKASRDRQPTLGEMTLEDFLVKAGIVAESSPGNKNAALGADPIALPQQSIAHQAQWVNYQIPPIHQPPQQQSHRQQQNMLNVFMPGHPVQQPLPISANPIMDAAYPDTQMTMSPSPLMGTLSDTQTPGRKRVAPGDVIEKTVERRQKRMIKNRESAARSRARKQAYTHELENKVSRLEEENERLKRQKEVEKVLPCVPPPEPKYQLRRTSSAPF
PgbZIP005	MVVPESEMTSQGEVESQLQSDQQHSRNNVFPLLGRQSSIYSLTLDEFQHTLCESGKNFGSMNMDEFLNSIWTAEENQVHAQAQGTTCTTLSTVMAHNNNQPQFSMGLSTSAEKTSIVRQPSLHKQGSLTLPGPLSHKTVDEVWSEIQKTQHEQQQSSNTNNKQNSGSTQRQPTYGEMTLEDFLVKAGVVREQGQPVQPIQQQPFGLYQNSNNCVGGPGHMARPIMGLGGGGVSVPPYPPQQTIVGEPSGYVGIGKRGGGYQPPTSCYGSRVGNGGGVVAGYGQVHGLGIGSPVSPVSSDGMCGSQVDSGNQYGLDMGGIRGGRKRIIDGPVEKVVERRQRRMIKNRESAARSRARKQAYTVELEAELNQLKEENAQLRQALVMNNPPSDFYFDEVKTRA…
PgbZIP006	MEPSDESESISTGGKVQSEVLPEDLMEDHSTSSSEKQYLSIFSLTIDKIQSMSGRSFGSMNIDEFLNSVWSDEFQVISSNVNEELTSNENGMEQATLLRQRSLSVPIPLSGKTVDEVWAEIQQNNHAQQNHRHAFPGLMTEKEALHQLQTLGEMTLEEFLVMAGVMKESPNFPLQQGILEENLNSNPSAGSFFSNGTSLDMSISMGQMMGYHHELSTPSSCVENGNTLLSSKGSSMHQMLTLGSSGFMGEPSTETIGNGKSCNSPSNAGETNSKRKTFPSMEAAIERRQRRMIKNRESAQRSRARKQAYTAELEIELKQVRDENESLKLALGSEHDWPIKTLRRTVTSSW
PgbZIP007	MPKWCIAMLWFPKARCDDRDAPIVASRCPNLLHRDAKGGASRCQSGASRCQSKLSSGLEATGDLFLTFTVMVSPPHNEYQEPHFPLLVGQDSLNNLSLHEFHTSLANTEEDSQFMQNPSSSSSSSSSSPPIVLKRNVEQVWKESFHQPRDKATNNMCFRQQLAPGERTSEEFLVRNGNDHDSIVCSPQPLMAIDRTAMVDSNFKVAELGYLDKQLGYPVVPIQVERKHCRLTNETLEKTVERRQRRMIKNRESAARCRARKQAYTNRLEHQVSELRRRNDGLKKLKQEAQMVLEDSDPPLMPRYQLRRTTSSTF
PgbZIP008	MDRVFSVDDIADQFWSPPPIRLSQAAAAAEQEESSSSASASSAMMNRSMSEWAFQRFLQEAAAESSPLSSSSSRPPSHDVVEIKDHDQPPSTAVTSGNNKPAASTFPLHTGAGAGAGGPPNVPIDSEEYQAYLKSRLNLACAAVALTRASSIRPQDSAALPDNGLQASDTSQLGCPASSKASGHDSSKGQEKDVSGPSGIPSLPVMQKKSAVQVKSTTSGSSREQSDDDDLEGDTETTENMDPADVKRVRRMLSNRESARRSRRRKQAHLTELETQVSQLRVENSSLSKRLTDIVQKYNDAAVDNRVLKADVETMRAKVKMAEEAVKRVTGLNPLFQAMSDISTIGMPSYTCSPSDTSTDAAVPLQDDPKQHQPFYQPASNNHLSSTHDPRIQNGLVDL…
PgbZIP009	MGSSEMDKPTKEAKDGKESKTPTSQEQAPATSTGTVNPDWSGFQAYSPMPPHGFMASSPQAHPYMWGVQHLMPPYGTPPHPYVAMYPHGGIYAHPSIPPGSYPFSPFAMPSPNGVAEASGNTPGSMEVDGKSSEGKEKLPIKRSKGSLGSLNMITGKNNEPSKVLVASTNGGYSKSAESGSEGSSEGSDGNSENDSQMKSGSRQDSLEGEVSQNGNAGHGSQNGGSNTPQSMINQSMTVMPISASGTPGAVPGPTTNLNIGMDYWGGANASAFPAIRGKVSSAPVAGGMVTAGSRDNVQSQLWLQDEREIKRQRRKQSNRESARRSRLRKQAECDELAQRAEVLKEENASLRAEVSRIRSEYEQLLAQNASLKERLGEAPGQDDARSGRNEQHMGNENQ…
PgbZIP010	MMDPKFAGKPIMAQHSGRSDLDQMSDTPTRGAHHRRAQSETFFRFPDDILLDDVVADFNLANLDFHSLSPDAAPMTTTVDSSSKSEEESSNGGADKPPPSKTARSGGSMSHFRSLSVDADFFDGLGFGGGSDVPEERKVGSGSGPFHHRHSNSMDGGQATSFEGDSMGMMVDNAKKALGPDRLAELSLIDPKRAKRILANRQSAARSKERKIRYTSELERKVQTLQTEATTLSAQVTMLQRDTTGLTSENKELKLRLQAMEQQAHLRDALNETLREEVQRLKIATGQIPSVNGNSYSRSLPPQYLHHFGNHPGQQPQQQQQQQQQQQLRMPNATTNNQTRSGQPRPTFMDFN
PgbZIP011	MQDPSNPNPKPPNAAPPSSFPTPPATSFRPSHHRRAHSEMNFRLPDDLDLVSDPFDAPSGSFEEIGSEDDLFCTYMDIEKLGSNLNDGGLDCRIDNAGGGSGGAGEEIGGDGEKSMRPRHRHSNSVDSSSLFGSESIEAKKAMAPDKLAELWTVDPKRAKRILANRQSAARSKERKARYINELERKVQTLQTEATTLSAQLTLFQRDTTGLSSENTELKLRLQAMEQQAHLRDALNEALKQEVERLRIATGEMSGGSDAYSLGMHHVTYNQSAFFSNQQQQPDQPQFHALQSNMSGHHHHPLLAAAHAQVLSESLQQQDPLGRFQGLDIGSRGSSHLVKSEGPSISASESSSTF
PgbZIP012	MGDTEEGGSTDMMQRVQSSFGTSSSSIPKPISFNQLDIPQLNTSQFRAQMRQFSPNFHNVDCGNKRVGIPPSHPQIPPLSPYSQIPVTRPGNQQMGNPNFTLGPSSHSRSLSQPSFFSLDSLPPLSPSPYRDSPSAPACDQLPGDVSMEDRDGSSHSLLPPSPFGGRGNSMRVGESLPPRKAHRRSSSDIPFGFSTIMQSSPPLIPLRGPATLERSTSARDHPGAKPVQLVKRESSWEKGGDNNAEGMGERKSEGEVVDDLFSAYMNLENIDTLNSSGTDDKQGTENREDLDSRASGTKTNGGDSSDNEATSSVNESGHSMQRSGISSMSEKREGLKRNAGGDIAPTTRHYRSVSMDSFMGKMNFGDESPKLPPSPGGRPGQLSPSDSIDGNSNGFSLE…
PgbZIP013	MDSPKNPSISNPNPTLSPSIAPNCFYFATSNDAASSPFKGSHHHRVHCEGVSGIANDNCDGEGDGFACVEEEIEIYDEDLFAKYIDVDMIGRVGGGGEGEEMVEVGNGGSGREEEKGKNEENVRGNVQHCGRDCSKKVMPADELAELWITDPKRAKRILANRQSAARSKERKARYIAALERRLVAIEKEARTLARRLSVYQRDARNLTAENTELRLRLEKMGRQAQLSDDLNEALKREVDRLRLATGEIRSARAISFKYLGKHHTQFSSTLPEAATPHDIQLLPLFHTSASTTPNRPLSANVQSNALDCLQGIDIRNKGCLLQVENPLRSASASHNSSSQGLNNVFCSREYLVRVASPSISDSGSDNSAATY
PgbZIP014	MAQLPPKAPTMPQTWPSFSYQMMQMPSSAAQPPSWVDEFLDFSSSRRNSHRRSVSDPIAFIEAPFIEECRNSNNGATTTLNNIGFERLDDDQLSSMFADDVAANWPSTRSSSNSSSPSDQNSDNEEKATAAEQLLHKQQQPKNEPAEVEDGGCPPKTDPDKFAFQASGDTIVDPKRVKRILANRQSAQRSRVRKLQYISELERSVTTLQTEVSALSPRVAFLDHQRLILNVDNSALKQRIAALAQDKIFKDAHQEALRKEIERLRKLYNEQQNVKKMGDNATSPPLEQSPTSFNNITSTDEE
PgbZIP015	MPLKVLKPKTISDPKTSHVGLSSPAILNQPKTSTRREASQKVVRDRETERQREKKQKGEGSFAEETLETLTETFDSQSSFLINSHCHSKIFVDTTGACCAWDMANSKGPSTVRNMYNGKHSLLPPKSPFPSIAPSYADYVPTPAIGPKGILKFREGNFHHQRTSSESHLIEEQPSWLDELLNEPETPIRRGHRRSSSDSFAYVDAANAANMDYTAQDEYKFRNLTSVPSWGSQDFVKDARNASFYAEPNSMLKHKNRPWESSPNALPHSSGLPSARDSFVLQNSVSSCASQEVDGISSTATEKHDAVDSGMHDAKASFERKDSSYAKGSASETDTKRAKQQFAQRSRVRKLQYIAELERNVQALQVEGTEVSAELEFLNQQSLILSMENKALKQRLESL…
PgbZIP016	MESSDGLPNSRSSTGKETLIPTVIPYPFVPPRYYSSSLSHVVGGGSNRSIPNPTPTETGLMRSHHQRCSSESVLPIEDQPSWLDDLLDEPDSPLYKGHRRSASDSSAYLDPSVETFNRRKESMLNNFSTGAWSSSPQNFANCRDHTNHASTLNSTQKSFSGQQNWVFQSSPNSSMNFSNGIPATRDGSITLQTSSGPSACSGPQETDRLPVMSSTISDQNQDRAGPSASQNPKNLGEKGDFSQANTSASKADVKHAKQKTAHRSRVRKLQYIAELERNVQVLQAEGSAVFAEIEFLDQQNLILSMENRALRQRLDSLSQEQLIKQLQHEMLERELGRLQALFQLQMQQQQLQRQQQQQQQQQKQQNAKNSRAKFKDLNSQFGNLSLNQNEASTSADSTT…
PgbZIP017	MSRQPQLPPRCPFQKKSSNASSHDPSSSAPCKEVHLFPWHHKSISQSSILEEQPVWLDELLSDSDSTMKGKCHRRASSDPVTLLDGLAELSVLNTLKDDENSDSKKTCVGLESACMYGPNSPRSKEKLSFPDNIVSALSNYSVQSPLQYRDGNHFTSGVPQYDTVQDACGSPAEVNLDIKPGKRNCGQRSRVRKIQYIAELERTVHVFQNLETELAVRVASLLHQRASLSLENRELKQQLARLQQEKLIVDGQSQSLRKEVERLKLCLSYSLDSKMSKYYRSNSKSEAVSSEAAWQMLDMRKLDIN
PgbZIP018	MTQLPPKVPNMTPNWPDNISHHQRMPSLDGLLTPNTANTAAATSQAPLWIDEFLDFSSSKRGSHRRSISDSAAFVDLPPMAGEEEECRRLSGLGSKTNNAASGGSTGHEFDRFDEDQFMSMFIDDAGPAMSCSNPPSPNSDHNSINDDKQVPIDQQIMQAQLIRSEAEEEDSLCNSDGQVNLHANFDNSNDKIFDPKRIKRILANRQSAQRSRVRKLHYISELERSVNSLQAEVSVLSPRVAYLDHQRLVLNVDNSVLKQRIAALSQDKLFKDGNTFSFSSLIMLFPPFCIYIS
PgbZIP019	MDKKPILHNNSSIFAGGDMNRSASELALEEFFKHSSNVPDVVSGRDDHKISEIIRSQRVAGVFAGTDGLFGADDDDVCSADLTSPYRNQELMNGFPSCGGLTGAPLWSPNLTPKNNSSISVTIDSQSSICAGSPTSAVTKPKGQDNQATGATSGSSHEQSDDDDIDTEAGPCEQSTDQIDVKRIKRMVSNRESARRSRRRKQAHLAELEQQVDHLRGEKSSLFKQLTDADQQLKDATTNNRVLKSDVEALRAKVKLAEDMVARGSLTSSLSHLLQNHLNTPQTFSNQNMYRMGSVSPTITVRGDHHSTSHPGLLPVSGQHSTVGLENANMFNSIGKNGIISDGGSCASDIWPWESQLPTVSK
PgbZIP020	MHAQNEGPLSPSIFPTTYCLPVPAASFFLSLKMSSESQVKDLNIYGKQAIAIAGSPLKSPSSLARRPILQTTSTSTSRSIDDVWNDISLSSLHHRTAAANDTTNPFHDFFSPSSTTNPCPGHFPPVHNHTTSGRAAGKVISVNQVPEPITNYLYKSSVSTSQSCNCAEPNFVSSSKPPPPNFIALPSSSSSNSSLPMKRPDPEYCEKHKRLMKNRESAARSRARKQARADELDLEVERLTVENAMLKKQLQQLQKLSNAAAPARVPKRCRLNRALTSPF
PgbZIP021	MASHRVGEAGLSGSGPSNHHHHHHHLPHAVFSGLNHPNLSFINQEGPAFDFGELEEAMVLHGIKIINDESKLPLYTAASAARPAPAATLEMFPSWPMRFHQTPTGGSSKSGGGGFRESTDSGSALNNTTSSKAEEEEEEDHLEPESPISTSSNKTSSGQQQAFDQLLQLPQQVDMDSEDSPRTGGSSQSQPAAPKSTLEKKKGAASTSERVLDAKTLRRLAQNREAARKSRLRKKAYVQQLESSRIRLTQLEQDLQRARSQGLFMGGGGGVGGSISSGAAIFDMEYARWLDDDQRHMAELRTGLHAHLSDGDLRVIVDGYIAHYDEIFSLKGVAAKSDVFHLITGMWTTPAERCFLWMGGFRPSELIKMLAIQLDPLTEQQVVGIYSLQDSSQQAEEAL…
PgbZIP022	MRPPTLNIFPSQPMHVEPSSTKGNTSTGLVSPETSGSKRSSEPSMELTQPKNEHAPTPPQQSKVIKREGNKKGPTSSSEQECPKTPDPKTLRRLAQNREAARKSRLRKKAYVQQLESSRIKLTQLEQELQRARTQGVYLGGGAVLGAEQGISLSMANMSSDAAVFDMEYARWLEEHHRLMCELRAAVQEHLPENELRLFVDNCLAHYDEMMNLKSMVAKTDVFHLMSGTWKTPAERCFMWMGGFRPSDIIKIIVSQIEPLTEQQLMGICGLQQSTAEAEEALSQGHDALNQSLSDTISSDSLSCPPNMANYMGQMAVAMNKLSTLEGFVRQADNLRHQTIHRMHQILTTRQAARCLLAIAEYFHRLRSLSSLWLQRPRQD
PgbZIP023	MMAELSPRTDTSTDGDTEDKALGFPSNQNLVVSDASDKSRDQKTLRRLAQNREAARKSRLRKKAYVQQLESSRMKLTQLEQELQRARQQGIFISSSGDQSQSMSGNGALAFDVEYARWLEEHNRRVNELRGAVNSHAGDGELRIIVDGIIAHYEDIFRIKGDAAKADVFHILSGMWKTPAERCFLWLGGFRSSELLKLLITQLEPLTEQQLLAISNLQQSSQQAEDALSQGMEALQQSLAETLAGSLGPSGSSGNVANYMGQMAMAMGKLGTLEGFIRQADNLRQQTLQQMHRILTTRQSARALLAINDYFSRLRALSSLWLARPRE
PgbZIP024	MGSKRLKVGAEADFSVAGRMPSFVSQIPVSNSNGTEGNTAHSSRVSHFGAPEQPPGFRVGDTSNVNRMFNPTNLANQAVHPDLQFGAFDKMLQLQKGRQANLASISGSHRDNWVESNMADSPRTDTSGDMDPDDKNPKFDMDPSTAIVASDSSDKSKEKSSEQKTLRRLAQNREAARKSRLRKKAYVQQLENSRLKLTQLEQELQRARQQGGLVSSSGDQSQVNGGNGALAFDVEYARWTEEQNRQINELRAAVNSHASDTELRTVVDNVIAHFDDIFRLKGTAAKADVFHIMSGMWKTPAERCFMWIGGFRSSELLKLLLNQLEPLTELQLAGIYKLQQSSQQAEDALSQGMEALQQSLAETLASGSPGPSGPSGNVANYMGQMAMAMGKLGTLEGFL…
PgbZIP025	MKQGNVVVSNNLQFGQNTNFSSATEMGTRGTGVDSGQFMMHKGSAAAAAAAPLTMVAVGGGGGGGSLGNEHFENWGDSGMADNSQQTDTSTDVDTEDKNQFHGVRQGSLVAVDSMDRSTGKMGDQKVLRRLAQNREAARKSRLRKKAYVQQLENSRLRLTQLEQELKRARQQGMFVSTGVSGDQSQSVVGNGAVAFDMDYARWLDEQQRLVNDLRSAVNSHVGDNELRLLVDGVMSHYDEIFRLKSIAAKSDVFHMLSGMWKTPAERCFMWLGGFRSSELLKILGSHLEPLTDQQLMGICNLQQSSQQAEDALSQGMEALQQSLVETLSSNAITLAGSGNVADYMGQMAIAMGKLATLENFLHQADLLRQQTLQQMHRILTTRQAARALLVISDYMSRL…
PgbZIP026	MQLSSMASTSTQFATSRRMGIYDPLHQISMWEDVFEGNISPNTGASTISQLDARIDNKSEYTSNESLGPSPDSQAAKNISDKLQRRLAQNREAARKSRLRKKAYVQQLETGRLKLAQLEQELERARQQGAYGGALNMGNALLGGSVNSGIAAFEMEYDLWVGEQQKKDCELRNVLQAHVSDIELRIFVESGLSHYYDLFRMKADAAKADVFYLISGLWRTPVERFFLWIGGFRPSELLNILMPQLEPLTEQQNMSVCKLQHSCQQAEDALSQGMEKLQQTLAQSITTDATCMGNYNSQMTSAMERLEALENFVNQADHLRQQTLQQMSRVLTTRQAARGLLALGDYFQRLRALSSLWSARPRDAT
PgbZIP027	MNSTSTQYVTARRMGVFEPIHQISMWGDFNDNGYQDASTTMITELDTKLDNQSDDTSQGVIGHSNLYDQEATKPVDKVLRRLAQNREAARKSRLRKKAHVQQLETSQLKLLQLEQELAQIRQQGAGGSGTANSGIAAFEMKYGQWVEEQTRQTNELRTALQSQLTDMELLILVNRGMKHYFDLFHMKATAAKADVFYLMSGMWKTPTERFFFWIGGFRPSELLKILKPHLDLVKQQSMDVHNLIQSCQQLEDALSQGMEKLKDTLAEAVAFGQLDEGSYYPKMYSAMDRLEALVTFVNQADHLRMETLQQMVRILTTRQAASGLVVLGEYFQRLRYLSTEWATRLREPA
PgbZIP028	MLPEIAANYCLAPENLSPFPNNFTSVQNNISSLHFSSFMSNLPYFQTSPPVLDFSPQSSSLSNNSTSDEAEEHQLNIIDERKQRRMISNRESARRSRMRKQKHLDELWSQVVRLRTENHNLIDKLNHASESHERVLKENAQLKEEASDLRQMLNEVQLARTYTALRDLDEVPCTTAHLRAEFSNQSMTASSNMLH
PgbZIP029	MQTSEVAELHYLVPPNPTPYPAHFSLTQNNIPTFQFSRISNPLYSLQITPQIQEFTPQPTCFSSNSTSDEGDEQQLSIINERKQRRMISNRESARRSRMRKQKHLDELWSQVVWLRNENHQLVDKLNNFSETHDRVRQENAQLKEEASELRQMLTDMQLNSPYPTLRNLDDIHCNTAYLGTESSNQSITSSSDVLP
PgbZIP030	MLPEMAAFNYLAHQNQSPFPANFNTIQSNFSGYYQTSHPVIDFTPPQYSSSLSNNSSTSDEAEENQINSIIDERKRRRMISNRESARRSRMRKQRQLDELWSQVVHLRNEYHDLMDKFNHVSESHDRVVKENEALKEETKDLRNMITEVQLGSDSSTLLR
PgbZIP031	MISTFPTVFPADGFLGTPFPTFEAGGFTPWDCQDHPFVFSPQEPIFSNSGSDNSNLDQKTNSSNSGSIEANPNLGEASAPVDERKRRRMISNRESARRSRMRKQKHLENLRNQVNRLKIGNRELMNRLRLVTHHGQLVRRENDRLQRESVMLQQKLWDIRQVLLVRQLHQQLLPPAWPCNNLTSINEQIPPSLIT
PgbZIP032	MQWVRGFRGRLCRRLLGKGSCVSLYIRKCSGSDGDQKLAMIDERKRKRMESNRESARRSRKRKQEHLDELISQINQLKNDNNLLMQKIDFATPKYISVAHENNVLRAQIAELTDRLNSLNSVLHIAEDVIGFDMDIPEIPDTLMEPWQLLFPFEPITASTNMFQC
PgbZIP033	MASSSGTSSVSSLLQNSGGSEENLQLLVDQRKRKRMISNRESARRSRMRKQKHLDDLMTQLSQLRKENNQIISSMRLTTQHYHKVEAENSILRAQVAELSHRLQSLNEIINCLNYNPINASFATEEPYTDSVDEFMNNYSLSYLYVNQQPILASADMVQY
PgbZIP034	MSVVTERSTQLPNSGSEGDLQVGMDQRKRKRMQSNRESARRSRMRKQKHLDDLMAQVAQLRKDNSQIHTTTSITTQQFLTVEAENSVLRAQMMELSQRLESLNDILNYMNTNHGIFETEPQQQQDHHLTGPGLGIGPDNFMNNPWNMMYINQQPIMASADMFQY
PgbZIP035	MMSCIEPVHCQFTPDEIHELLSLFQADSSPLNSTSGSEVNRSVYSMEERKRRRMISNRESARRSRQRKKRHLEKLTDQLNHLKVENRELRNRLCLLGQQCHYVFSETDRLRSEYMHLQIKLSGLSQILVAMQQLQSHQP
PgbZIP036	MEMFPMKQASSESEQDDRYAMLDEKKRKRMISNRESARKSRMKREQHMKDLNDQVLYFETRKNEMIRKLNEVTELYRAIEVDNIIMRSQKQELTERLECAEILFSYVGETSGVPVRAHQDPWHRSWQQPPPQSMPIMSSAGFFQF
PgbZIP037	MASSSGTSSGSISQLQHSGSEGGLQEIMDQKKRKRMVSNRESARRSRMRKQKHLDDLVAQVGQLSSENSHIVTNMKLTGQMYLNLDAENYILRAQLAELTHRLDSLNEIMNCLNSTDGLFETDNHDDPMISGGIDSFLNPWNLLDVNQPIMAYPIV
PgbZIP038	MGAGEESSPAKHAKPTLSPQEIPTPPSYPDWSSSMQAYYGAGGTPPFFASTVASPTPHPYMWGGQHPLMPPYGTPVPYPALYPPAGVYAHPSMATTPSTAPANAELEGKVPEGKERPPTKKSKGTSGNANHIGGRAGESAKAASSSGNDGATQSAESGSDGSSDASDENNDRNDIHGNKKGSFHQMLAEATAQNNTSGPNLQTSVPGNPVVSVPATNLNMGMDLWNASAGSGAMKGRPNAVVGRDGMMPDQWVQQDERELKRQKRKQSNRESARRSRLRKQAECEELQTRVESLSSENHTLRDELRRLSEECEKLTSENNTIKGELTRICGPEAVSKLESNSMLGNS
PgbZIP039	MGSSEEAKACKPEISSSPAPDQANVHVYPDWAAMQAYYGPRVAVPPYFNSAVASGHAPHPYMWGPPQHMMPPYGAAYAAIYPHGGVYAHPGVPLAATPLSNDSPAKSSGNSDRGLMKKLKGFDGLAMSLGNGSADSDDGGNTHSQSGETEGSSEGSDGNTKGGDQTCGKRSWDGSPNNAKVRKVETQSSQALSGEANGASKKVMGVSVSTVGVSNKLEGAVLSASPTTELELRKSPTANVKTTPTTVQQPGHMIPHESLLQNERELKRERRKQSNRESARRSRLRKQAEAEELAIKVDSLTTENLTLKSELNQLTDNSEKLKHENAKLMEKLKNAQQEQIEDPRSDNKGLSLSTANLLSRVNNSSSSIVRNDGEGEIYENTSKSGAKLHQLLDSSPRTD…
PgbZIP040	MRATEESLPTKSSKPTAVQEFPTAPAYLNWSASMQAYYGSGATLPPFFTSATAPAPSPSPSVAHPYLWGSQCPMVSQYGIGLPYPALYPPRQPPYAPSDISTAQHAPLTNTVTKKASDEKDLLSMDMVTRTSGDAVLKDRKSVESLKVASGSENDGASHSDESACASLSEASDENANKEASSPTKKRRFDQSPAYEANATSNSAAQHNRENPLARSMAHFNIERSTASDTLQQLAPLAMVACNGMLHDQHQYSQDVREIKREKRKQSNRESARRSRLRKMAECEELQVRVDVLYNETRTMREELQRLAEECEEVACENNIMMEELRHSGGPNVPSSLLVGSNNDAVLCSVNGEPNGLSTECN
PgbZIP041	MDEIRAPSFYLPPNAAAECRADRMVMIELEAAETLAGLAHSAVTENHGGGSALSEPVKDDELPPGHSEFDPVNSVREPPNLSEDQGLLQQQHCEKVQSIIIKPIKDEEFFEADLNPTCTTSYASSASGKSRQNLTEAEKEARRIRRILANRESARQTIRRRQAIFDELTTKAADLAWENGKLKREMESAVKEYDSLKSTNESLKIQMIKMLNVEAEETQEETHAEIAACPSTKSPFLICNQPAFFPFVWPSMVQPTNSVQLQCGPQGGIVFPSPIPMPANDKLDPSSYGEGNPIITNGSGPPLYVLPCPWLFPLPQHSFEHQLQSFDLNDKPHETLHGNQYSPCSSAETVVLMENCHLLPIKVKAEASMSEEAILANSLHNNSRGHSPDGVGQHIGSRP…
PgbZIP042	MADTTLADPMMILPPNNDDFDPLPIPPLDPSIFSDDFDLSDNNFLSFDDQDFDITFDDLYLPSDTDEFLNLGSNTTQLASDPESGCVNEYVSDPESGGDRVLNSESGRVSDDPDVAGFLNIPSQESGDKSLSFPSPESGNNNPVSSQGSGDCGSAVSGSEGLNYPSPDSSNSANNSINEVVDQKVKEEDLGNSSLLKRKKENGDSNSESRNSKYRRSNAASESANQSSGLNDEDEKKKARLIRNRESAQLSRQRKKHYVEELEDKVRAMHSTIQDLNAKISYIVAENASLRQQMGGNGAGAGAVCPPPVMYPHPGMAPMPYPWMPCPPYVVKPQGSQVPLVPIPRLKPQQPTAAPKAKKTEARKAEGKTKKVASVSFLGLLFFIILFGGLVPMVNVKYW…
PgbZIP043	MEASESDSSNNGEVKSNVVPQTPEDLLQDRSISLSENQHLSIFSLTLDEFQSRSGMSFASMNFDEFLNSVTSEIEFQVSSNVNQELVNNENGIAAQTGLPRQGSLSVPTQLCSITIDEVWAEIQQNNHVDQENHGHGHQEAFPSFSTNDELLPLQSLGEMTLEEFLIKAGVIKESPNNDLPLQQGGVLEQHLNINHSISYITSNSTFLDTTSISVEQVMDGYEFSTPPSNCDDGNGNTLISDHGSSVYPMLALDSGGCVGGEPTNNVENQICKSPSNAGETSSKRKRSAAPMEMNMERRQRRMIRNRESAARSRARKQVCVLHIT
PgbZIP044	MQEQAATSSLAASLPSSSEPSSSSALQIEVKEGMESDDEIRRVPEIGGEAVGTSADGREASSAAGRDRVQGSGEGTRKRGRSPADKENKRLKRLLRNRVSAQQARERKKAYLNELEVRVKDLEKKNSELEERLSTLQNENQMLRHILKNTTAGMQEGRK
PgbZIP045	MEEVWKDINLSSLHNHSTTGFRGVILQDFLARPFSKDPPTSVPPTGYGSPTPPTAVARPSPTPALLNLNSDPDHHLHFLGLIHPDDPNTRAPITNVGPLGMPFDDVLASSTSSSLQAHNGKLKSFPENERSSGGGDRRQKLAFPVEWAVQKFAMMKKAYTNELQIEVERLKEENARLRKQQQQLSQAAAAEQFPKKSTLHRTSTAPF
PgbZIP046	MGKSEESSYVKMESVSPPRQELRDIHLYPDWATIQAFYSHGVPLQQPYFNPGVSDGHVPPHARLWTPPQPLIPLYGLPYPAVYSQGVVYAHPALPLVSNPSSKESLSNSSDKIDHGSTKKLRRLDGIALPVGNDCAQVDTEASVHEVSQSVGTDASSDGSDGKSGAHQSRQRSNSTEACGKVNVQANAVPEYCVEAPVAPKILRHNPVHIPNGKAEPNLVCANEGLPFEVRVQVIRIMQVLID
