# Supplementary material for: Genome-wide analysis of bZIP transcription factors and their expression patterns in response to methyl jasmonate and low-temperature stresses in Platycodon grandiflorus
Source: PeerJ. 2024 Apr 30;12:e17371. doi: 10.7717/peerj.17371 (PMC11067905; doi:10.7717/peerj.17371)
Supplement: Supplemental Information 4 [file peerj-12-17371-s004.xlsx]

## Sheet: Sheet1
Table S3. List of all bZIP proteins identified in P. grandiflorus
name	Subcellular localization	pI	Grand average of hydropathicity (GRAVY)	Molecular weight	Chromosome	Chromosome length	Gene start	Gene end	Gene Length
PgbZIP043	nuclear	4.65	-0.578	35724.2	Pgchr9		14248024	14249001	977
PgbZIP006	nuclear	5.07	-0.651	38882.2	Pgchr6	54990282	16321084	16323835	2751
PgbZIP018	nuclear	5.37	-0.568	32794.6	Pgchr5		58748431	58750384	1953
PgbZIP014	nuclear	5.42	-0.854	33910.6	Pgchr3		10491102	10494574	3472
PgbZIP040	nuclear	5.5	-0.715	39561.9	Pgchr2		24062638	24068761	6123
PgbZIP037	nuclear	5.68	-0.552	17449.6	Pgchr1		59960279	59961625	1346
PgbZIP029	nuclear	5.68	-0.911	22790.3	Pgchr1		77847824	77848887	1063
PgbZIP042	nuclear	5.72	-0.527	78765.9	Pgchr3		42931811	42936001	4190
PgbZIP011	nuclear	5.75	-0.786	38693.6	Pgchr1	103308309	90145650	90150034	4384
PgbZIP008	nuclear	5.75	-0.684	48254.2	Pgchr5	59670001	41409813	41418218	8405
PgbZIP019	nuclear	5.84	-0.644	39087.1	Pgchr2		41569355	41576451	7096
PgbZIP041	nuclear	5.86	-0.554	54602.8	Pgchr3		27241136	27255725	14589
PgbZIP021	nuclear	5.96	-0.492	56898.6	Pgchr6		16368370	16376598	8228
PgbZIP046	nuclear	6.04	-0.417	26326.6	Pgchr1		101846978	101851583	4605
PgbZIP028	nuclear	6.06	-0.772	22471	Pgchr2		65581849	65582743	894
PgbZIP030	nuclear	6.07	-1.014	18765.7	Pgchr2		65573191	65573980	789
PgbZIP002	nuclear	6.1	-0.588	30900.7	Pgchr5		25610813	25618267	7454
PgbZIP009	nuclear	6.18	-0.937	43649.8	Pgchr4		52804347	52817371	13024
PgbZIP013	nuclear	6.24	-0.637	40827.4	Pgchr6		39530939	39533442	2503
PgbZIP038	nuclear	6.27	-0.92	36911.6	Pgchr1		62755623	62763814	8191
PgbZIP027	cytoplasmic	6.47	-0.482	39948.5	Pgchr7	50635268	31188141	31202597	14456
PgbZIP012	nuclear	6.49	-0.895	63115.7	Pgchr5		5652560	5657886	5326
PgbZIP034	nuclear	6.51	-0.888	18943.3	Pgchr2		22605766	22607179	1413
PgbZIP026	nuclear	6.56	-0.492	41148.5	Pgchr4		50628245	50631817	3572
PgbZIP025	nuclear	6.77	-0.393	45138.9	Pgchr2		69463452	69467532	4080
PgbZIP039	nuclear	6.85	-0.808	43016.5	Pgchr9	29628164	3717744	3726056	8312
PgbZIP010	nuclear	6.88	-0.907	38948.1	Pgchr4		48596907	48603041	6134
PgbZIP016	nuclear	7.77	-0.903	44873.3	Pgchr4		39858907	39860950	2043
PgbZIP036	nuclear	7.86	-0.971	17380.8	Pgchr7		11044300	11045631	1331
PgbZIP033	nuclear	7.88	-0.691	18389.6	Pgchr3		2813694	2815137	1443
PgbZIP017	nuclear	8.34	-0.689	34453.8	Pgchr5		6881410	6891622	10212
PgbZIP005	nuclear	8.43	-0.7	45843.2	Pgchr3	80501734	28192153	28194001	1848
PgbZIP015	nuclear	8.46	-0.838	53189.2	Pgchr5		26904620	26916635	12015
PgbZIP001	nuclear	8.54	-0.577	33593	Pgchr4		49007869	49018075	10206
PgbZIP022	nuclear	8.62	-0.583	42727.7	Pgchr3		75172341	75178889	6548
PgbZIP023	nuclear	8.64	-0.493	36471.2	Pgchr6		792837	822218	29381
PgbZIP045	nuclear	8.89	-0.646	22854.7	Pgchr1		56618308	56620979	2671
PgbZIP032	nuclear	8.98	-0.557	19194.1	Pgchr1		63461071	63461973	902
PgbZIP024	nuclear	9.04	-0.618	49529.5	Pgchr3		50707021	50715902	8881
PgbZIP007	nuclear	9.06	-0.751	35861.6	Pgchr4	66886967	50653244	50655964	2720
PgbZIP004	nuclear	9.17	-0.826	37521.2	Pgchr3		41090459	41106739	16280
PgbZIP003	nuclear	9.43	-0.65	46999.8	Pgchr2	83005791	26521441	26527218	5777
PgbZIP035	nuclear	9.46	-0.816	16463.8	Pgchr2		30067253	30068176	923
PgbZIP044	nuclear	9.47	-1.099	17548.5	Pgchr7		44432876	44436545	3669
PgbZIP020	nuclear	9.69	-0.546	30513.5	Pgchr4		4093115	4097431	4316
PgbZIP031	nuclear	10.23	-0.759	22448.4	Pgchr1		69430822	69432544	1722
