# Supplementary material for: Genome-wide analysis of bZIP transcription factors and their expression patterns in response to methyl jasmonate and low-temperature stresses in Platycodon grandiflorus
Source: PeerJ. 2024 Apr 30;12:e17371. doi: 10.7717/peerj.17371 (PMC11067905; doi:10.7717/peerj.17371)
Supplement: Supplemental Information 5 [file peerj-12-17371-s005.xls]

## Sheet: Sheet1
ITEM TO CHECK	IMPORTANCE	CHECKLIST
EXPERIMENTAL DESIGN
Definition of experimental and control groups	E	line219
Number within each group	E	line155
Assay carried out by core lab or investigator's lab?	D
Acknowledgement of authors' contributions	D
SAMPLE
Description	E	line144
Volume/mass of sample processed	D
Microdissection or macrodissection	E	macrodissection
Processing procedure	E	line150
If frozen - how and how quickly?	E	line156
If fixed - with what, how quickly?	E
Sample storage conditions and duration (especially for FFPE samples)	E	line156
NUCLEIC ACID EXTRACTION
Procedure and/or instrumentation	E	line207
Name of kit and details of any modifications	E	line207
Source of additional reagents used	D
Details of DNase or RNAse treatment	E	line208
Contamination assessment (DNA or RNA)	E	line211
Nucleic acid quantification	E	line211
Instrument and method	E	line211
Purity (A260/A280)	D
Yield	D
RNA integrity method/instrument	E	line210
RIN/RQI or Cq of 3' and 5' transcripts	E	line212
Electrophoresis traces	D
Inhibition testing (Cq dilutions, spike or other)	E
REVERSE TRANSCRIPTION
Complete reaction conditions	E	line208
Amount of RNA and reaction volume	E	line208
Priming oligonucleotide (if using GSP) and concentration	E	line208
Reverse transcriptase and concentration	E	line208
Temperature and time	E	line208
Manufacturer of reagents and catalogue numbers	D
Cqs with and without RT	D*
Storage conditions of cDNA	D
qPCR TARGET INFORMATION
If multiplex, efficiency and LOD of each assay.	E
Sequence accession number	E
Location of amplicon	D
Amplicon length	E
In silico specificity screen (BLAST, etc)	E
Pseudogenes, retropseudogenes or other homologs?	D
Sequence alignment	D
Secondary structure analysis of amplicon	D
Location of each primer by exon or intron (if applicable)	E
What splice variants are targeted?	E
qPCR OLIGONUCLEOTIDES
Primer sequences	E	line210
RTPrimerDB Identification Number	D
Probe sequences	D**
Location and identity of any modifications	E
Manufacturer of oligonucleotides	D
Purification method	D
qPCR PROTOCOL
Complete reaction conditions	E	line215
Reaction volume and amount of cDNA/DNA	E	line215
Primer, (probe), Mg++ and dNTP concentrations	E	line215
Polymerase identity and concentration	E	line215
Buffer/kit identity and manufacturer	E	line215
Exact chemical constitution of the buffer	D
Additives (SYBR Green I, DMSO, etc.)	E	line215
Manufacturer of plates/tubes and catalog number	D
Complete thermocycling parameters	E	line215
Reaction setup (manual/robotic)	D
Manufacturer of qPCR instrument	E	line215
qPCR VALIDATION
Evidence of optimisation (from gradients)	D
Specificity (gel, sequence, melt, or digest)	E	line215
For SYBR Green I, Cq of the NTC	E	line215
Standard curves with slope and y-intercept	E	line215
PCR efficiency calculated from slope	E	line215
Confidence interval for PCR efficiency or standard error	D
r2 of standard curve	E	line215
Linear dynamic range	E	line215
Cq variation at lower limit	E	line215
Confidence intervals throughout range	D
Evidence for limit of detection	E	line215
If multiplex, efficiency and LOD of each assay.	E
DATA ANALYSIS
qPCR analysis program (source, version)	E	line221
Cq method determination	E	line219
Outlier identification and disposition	E	line219
Results of NTCs	E	line219
Justification of number and choice of reference genes	E	line219
Description of normalisation method	E	line219
Number and concordance of biological replicates	D
Number and stage (RT or qPCR) of technical replicates	E	line219
Repeatability (intra-assay variation)	E
Reproducibility (inter-assay variation, %CV)	D
Power analysis	D
Statistical methods for result significance	E	line223
Software (source, version)	E	line223
Cq or raw data submission using RDML	D
Table 1. MIQE checklist for authors, reviewers and editors. All essential information (E) must be submitted with the manuscript. Desirable
information (D) should be submitted if available. If using primers obtained from RTPrimerDB, information on qPCR target, oligonucleotides,
protocols and validation is available from that source.
*: Assessing the absence of DNA using a no RT assay is essential when first extracting RNA. Once the sample has been validated as
RDNA-free, inclusion of a no-RT control is desirable, but no longer essential.
**: Disclosure of the probe sequence is highly desirable and strongly encouraged. However, since not all commercial pre-designed assay
vendors provide this information, it cannot be an essential requirement. Use of such assays is advised against.
