# Supplementary material for: Genome-wide analysis of bZIP transcription factors and their expression patterns in response to methyl jasmonate and low-temperature stresses in Platycodon grandiflorus
Source: PeerJ. 2024 Apr 30;12:e17371. doi: 10.7717/peerj.17371 (PMC11067905; doi:10.7717/peerj.17371)
Supplement: Supplemental Information 6 [file peerj-12-17371-s006.xlsx]

## Sheet: Sheet1
low temperature			18s			PgbZIP022			PgbZIP024			PgbZIP003			PgbZIP019			PgbZIP032			PgbZIP005			PgbZIP021			PgbZIP046			PgbZIP011			PgbZIP042
	0h	cp	21.34	21.61	21.51	26.97	26.93	26.96	21.89	21.87	21.91	18.53	18.47	18.51	24.37	24.43	24.32	26.07	26.04	26.09	26.59	26.56	26.63	24.68	24.66	24.71	23.34	23.48	23.28	21.54	21.52	21.57	23.14	23.11	23.13
	1h	cp	21.02	21.06	21.04	24.14	24.17	24.13	21.04	21.02	21.06	18.51	18.59	18.72	25.18	25.25	25.29	32.48	32.46	32.45	27.6	27.61	27.58	22.55	22.53	22.58	23.59	23.65	23.42	21.34	21.3	21.36	23.23	23.19	23.22
	3h	cp	19.73	19.64	19.68	25.8	25.76	25.82	20.27	20.23	20.26	18.13	18.24	18.09	25.49	25.52	25.31	29.43	29.43	29.38	27.93	27.93	27.86	23.63	23.6	23.65	24.34	24.48	24.51	21.34	21.3	21.33	22.95	22.93	22.97
	6h	cp	21.59	21.55	21.57	27.01	27.09	27.05	21.29	21.27	21.28	19.53	19.45	19.67	25.61	25.63	25.54	29.09	29.05	29.11	28.76	28.78	28.72	23.9	23.87	23.92	22.32	22.44	22.37	22.54	22.51	22.49	23.06	23.04	23.02
	9h	cp	21.8	21.62	21.75	28.6	28.62	28.59	22.11	22.13	22.09	18.95	18.93	18.87	24.76	24.61	24.72	29.21	29.25	29.19	29.74	29.72	29.69	25.52	25.49	25.55	21.44	21.38	21.53	22.62	22.59	22.65	23.26	23.24	23.21
	12h	cp	20.63	20.69	20.66	26.54	26.52	26.56	20.71	20.69	20.73	18.31	18.36	18.52	22.77	22.64	22.48	29.56	29.53	29.59	27.87	27.85	27.83	23.67	23.63	23.71	22.55	22.43	22.38	22.72	22.69	22.75	21.52	21.5	21.49
		PgbZIP022						PgbZIP024						PgbZIP003						PgbZIP019						PgbZIP032
		0h	1h	3h	6h	9h	12h	0h	1h	3h	6h	9h	12h	0h	1h	3h	6h	9h	12h	0h	1h	3h	6h	9h	12h	0h	1h	3h	6h	9h	12h
	18s	21.4867	21.04	19.6833	21.57	21.7233	20.66	21.4867	21.04	19.6833	21.57	21.7233	20.66	21.4867	21.04	19.6833	21.57	21.7233	20.66	21.4867	21.04	19.6833	21.57	21.7233	20.66	21.4867	21.04	19.6833	21.57	21.7233	20.66
		26.97	24.14	25.8	27.01	28.6	26.54	21.89	21.04	20.27	21.29	22.11	20.71	18.53	18.51	18.13	19.53	18.95	18.31	24.37	25.18	25.49	25.61	24.76	22.77	26.07	32.48	29.43	29.09	29.21	29.56
		26.93	24.17	25.76	27.09	28.62	26.52	21.87	21.02	20.23	21.27	22.13	20.69	18.47	18.59	18.24	19.45	18.93	18.36	24.43	25.25	25.52	25.63	24.61	22.64	26.04	32.46	29.43	29.05	29.25	29.53
		26.96	24.13	25.82	27.05	28.59	26.56	21.91	21.06	20.26	21.28	22.09	20.73	18.51	18.72	18.09	19.67	18.87	18.52	24.32	25.29	25.31	25.54	24.72	22.48	26.09	32.45	29.38	29.11	29.19	29.59
	△t	5.48333	3.1	6.11667	5.44	6.87667	5.88	0.403333	0	0.586667	-0.28	0.386667	0.05	-2.95667	-2.53	-1.55333	-2.04	-2.77333	-2.35	2.88333	4.14	5.80667	4.04	3.03667	2.11	4.58333	11.44	9.74667	7.52	7.48667	8.9
		5.44333	3.13	6.07667	5.52	6.89667	5.86	0.383333	-0.02	0.546667	-0.3	0.406667	0.03	-3.01667	-2.45	-1.44333	-2.12	-2.79333	-2.3	2.94333	4.21	5.83667	4.06	2.88667	1.98	4.55333	11.42	9.74667	7.48	7.52667	8.87
		5.47333	3.09	6.13667	5.48	6.86667	5.9	0.423333	0.02	0.576667	-0.29	0.366667	0.07	-2.97667	-2.32	-1.59333	-1.9	-2.85333	-2.14	2.83333	4.25	5.62667	3.97	2.99667	1.82	4.60333	11.41	9.69667	7.54	7.46667	8.93
	△△t	5.46667						0.403333						-2.98333						2.88667						4.58
		0.0166667	-2.36667	0.65	-0.0266667	1.41	0.413333	0	-0.403333	0.183333	-0.683333	-0.0166667	-0.353333	0.0266667	0.453333	1.43	0.943333	0.21	0.633333	-0.00333333	1.25333	2.92	1.15333	0.15	-0.776667	0.00333333	6.86	5.16667	2.94	2.90667	4.32
		-0.0233333	-2.33667	0.61	0.0533333	1.43	0.393333	-0.02	-0.423333	0.143333	-0.703333	0.00333333	-0.373333	-0.0333333	0.533333	1.54	0.863333	0.19	0.683333	0.0566667	1.32333	2.95	1.17333	6.52811e-14	-0.906667	-0.0266667	6.84	5.16667	2.9	2.94667	4.29
		0.00666667	-2.37667	0.67	0.0133333	1.4	0.433333	0.02	-0.383333	0.173333	-0.693333	-0.0366667	-0.333333	0.00666667	0.663333	1.39	1.08333	0.13	0.843333	-0.0533333	1.36333	2.74	1.08333	0.11	-1.06667	0.0233333	6.83	5.11667	2.96	2.88667	4.35
	2^(-△△t)	0.988514	5.15748	0.63728	1.01866	0.376312	0.750886	1	1.32256	0.880666	1.60585	1.01162	1.27751	0.981686	0.730353	0.371131	0.52003	0.864537	0.644685	1.00231	0.419478	0.132127	0.449585	0.90125	1.71317	0.997692	0.00860863	0.0278406	0.130308	0.133354	0.0500669
		1.0163	5.05134	0.655197	0.963707	0.371131	0.761368	1.01396	1.34102	0.905425	1.62826	0.997692	1.29534	1.02337	0.690956	0.343885	0.549681	0.876606	0.622725	0.961483	0.399611	0.129408	0.443396	1	1.87471	1.01866	0.00872881	0.0278406	0.133972	0.129707	0.0511189
		0.99539	5.19335	0.628507	0.990801	0.378929	0.740549	0.986233	1.30435	0.886791	1.61702	1.02574	1.25992	0.99539	0.631418	0.381565	0.471937	0.913831	0.557354	1.03766	0.388683	0.149685	0.471937	0.926588	2.09459	0.983957	0.00878952	0.0288224	0.128514	0.135216	0.0490365
	AV	1.00007	5.13406	0.640328	0.991055	0.375457	0.750935	1.00006	1.32264	0.890961	1.61704	1.01168	1.27759	1.00015	0.684243	0.365527	0.513883	0.884991	0.608255	1.00049	0.402591	0.137073	0.454973	0.942613	1.89416	1.0001	0.00870899	0.0281679	0.130931	0.132759	0.0500741
	SD	0.0144744	0.0738467	0.0136035	0.0274752	0.00396872	0.0104099	0.0138635	0.0183353	0.0128953	0.0112084	0.0140246	0.0177107	0.0212478	0.0498084	0.0194547	0.0392348	0.0256948	0.045428	0.0381212	0.0156121	0.0110061	0.0150141	0.051288	0.191452	0.0174746	9.20571e-05	0.00056684	0.00278158	0.00280185	0.00104121
		PgbZIP005						PgbZIP021						PgbZIP046						PgbZIP011						PgbZIP042
		0h	1h	3h	6h	9h	12h	0h	1h	3h	6h	9h	12h	0h	1h	3h	6h	9h	12h	0h	1h	3h	6h	9h	12h	0h	1h	3h	6h	9h	12h
	18s	21.4867	21.04	19.6833	21.57	21.7233	20.66	21.4867	21.04	19.6833	21.57	21.7233	20.66	21.4867	21.04	19.6833	21.57	21.7233	20.66	21.4867	21.04	19.6833	21.57	21.7233	20.66	21.4867	21.04	19.6833	21.57	21.7233	20.66
		26.59	27.6	27.93	28.76	29.74	27.87	24.68	22.55	23.63	23.9	25.52	23.67	23.34	23.59	24.34	22.32	21.44	22.55	21.54	21.34	21.34	22.54	22.62	22.72	23.14	23.23	22.95	23.06	23.26	21.52
		26.56	27.61	27.93	28.78	29.72	27.85	24.66	22.53	23.6	23.87	25.49	23.63	23.48	23.65	24.48	22.44	21.38	22.43	21.52	21.3	21.3	22.51	22.59	22.69	23.11	23.19	22.93	23.04	23.24	21.5
		26.63	27.58	27.86	28.72	29.69	27.83	24.71	22.58	23.65	23.92	25.55	23.71	23.28	23.42	24.51	22.37	21.53	22.38	21.57	21.36	21.33	22.49	22.65	22.75	23.13	23.22	22.97	23.02	23.21	21.49
	△t	5.10333	6.56	8.24667	7.19	8.01667	7.21	3.19333	1.51	3.94667	2.33	3.79667	3.01	1.85333	2.55	4.65667	0.75	-0.283333	1.89	0.0533333	0.3	1.65667	0.97	0.896667	2.06	1.65333	2.19	3.26667	1.49	1.53667	0.86
		5.07333	6.57	8.24667	7.21	7.99667	7.19	3.17333	1.49	3.91667	2.3	3.76667	2.97	1.99333	2.61	4.79667	0.87	-0.343333	1.77	0.0333333	0.26	1.61667	0.94	0.866667	2.03	1.62333	2.15	3.24667	1.47	1.51667	0.84
		5.14333	6.54	8.17667	7.15	7.96667	7.17	3.22333	1.54	3.96667	2.35	3.82667	3.05	1.79333	2.38	4.82667	0.8	-0.193333	1.72	0.0833333	0.32	1.64667	0.92	0.926667	2.09	1.64333	2.18	3.28667	1.45	1.48667	0.83
	△△t	5.10667						3.19667						1.88						0.0566667						1.64
		-0.00333333	1.45333	3.14	2.08333	2.91	2.10333	-0.00333333	-1.68667	0.75	-0.866667	0.6	-0.186667	-0.0266667	0.67	2.77667	-1.13	-2.16333	0.01	-0.00333333	0.243333	1.6	0.913333	0.84	2.00333	0.0133333	0.55	1.62667	-0.15	-0.103333	-0.78
		-0.0333333	1.46333	3.14	2.10333	2.89	2.08333	-0.0233333	-1.70667	0.72	-0.896667	0.57	-0.226667	0.113333	0.73	2.91667	-1.01	-2.22333	-0.11	-0.0233333	0.203333	1.56	0.883333	0.81	1.97333	-0.0166667	0.51	1.60667	-0.17	-0.123333	-0.8
		0.0366667	1.43333	3.07	2.04333	2.86	2.06333	0.0266667	-1.65667	0.77	-0.846667	0.63	-0.146667	-0.0866667	0.5	2.94667	-1.08	-2.07333	-0.16	0.0266667	0.263333	1.59	0.863333	0.87	2.03333	0.00333333	0.54	1.64667	-0.19	-0.153333	-0.81
	2^(-△△t)	1.00231	0.365177	0.11344	0.235969	0.133046	0.23272	1.00231	3.21912	0.594604	1.82344	0.659754	1.13813	1.01866	0.628507	0.145928	2.18859	4.47949	0.993092	1.00231	0.844791	0.329877	0.530957	0.558644	0.249423	0.990801	0.68302	0.323836	1.10957	1.07425	1.71713
		1.02337	0.362654	0.11344	0.23272	0.134904	0.235969	1.0163	3.26406	0.607097	1.86176	0.673617	1.17013	0.92445	0.602904	0.132433	2.01391	4.66971	1.07923	1.0163	0.868541	0.339151	0.542113	0.570382	0.254664	1.01162	0.702222	0.328356	1.12506	1.08925	1.7411
		0.974905	0.370274	0.11908	0.242603	0.137738	0.239263	0.981686	3.15287	0.586417	1.79834	0.646176	1.10701	1.06191	0.707107	0.129707	2.11404	4.20858	1.11729	0.981686	0.833161	0.332171	0.549681	0.547147	0.24429	0.997692	0.687771	0.319377	1.14076	1.11214	1.75321
	AV	1.0002	0.366035	0.11532	0.237097	0.135229	0.235984	1.0001	3.21202	0.596039	1.82785	0.659849	1.13842	1.00167	0.646172	0.136023	2.10551	4.45259	1.0632	1.0001	0.848831	0.333733	0.540917	0.558724	0.249459	1.00004	0.691004	0.323856	1.12513	1.09188	1.73715
	SD	0.0243037	0.00388192	0.00325617	0.00503703	0.00236284	0.00327135	0.0174152	0.0559323	0.0104145	0.0319377	0.0137204	0.0315607	0.070288	0.0543012	0.00868601	0.0876496	0.231739	0.0636293	0.0174152	0.0180331	0.00483027	0.00941923	0.0116177	0.00518707	0.0106057	0.0100012	0.00448949	0.0155972	0.0190782	0.0183623
Meja			18s			PgbZIP022			PgbZIP024			PgbZIP003			PgbZIP019			PgbZIP032			PgbZIP005			PgbZIP021			PgbZIP046			PgbZIP011			PgbZIP042
	0h	cp	21.29	20.96	20.53	26.54	26.52	26.58	21.23	21.17	21.21	28.37	28.29	28.39	25.43	25.59	25.39	28.01	28.03	27.96	28.82	28.79	28.85	23.98	23.96	24.01	28.37	28.29	28.39	22.01	21.97	22.03	21.79	21.75	21.81
	6h	cp	20.73	21.01	20.93	27.05	27.11	27.03	22.48	22.45	22.52	30.53	30.5	30.55	27.71	27.69	27.78	27.3	27.32	26.29	30.53	30.5	30.55	25.09	25.09	25.07	29.53	29.5	29.55	22.91	22.89	22.94	22.48	22.52	22.47
	1d	cp	21.57	21.55	21.56	27.05	27.12	27.11	22.09	22.06	22.13	29.59	29.67	29.55	26.93	27.11	27.07	26.86	26.83	26.9	30.57	30.51	30.55	25.25	25.23	25.28	29.12	29.26	29.31	22.7	22.67	22.72	22.73	22.71	22.76
	4d	cp	21.87	21.9	21.83	27.68	27.69	27.67	21.35	21.37	21.32	29.59	29.66	29.54	26.59	26.43	26.48	25.78	25.73	25.76	30.54	30.57	30.51	24.7	24.67	24.66	29.13	29.14	29.19	22.83	22.8	22.87	22.68	22.65	22.72
		PgbZIP022				PgbZIP024				PgbZIP003				PgbZIP019				PgbZIP032
		0h	6h	1d	4d	0h	6h	1d	4d	0h	6h	1d	4d	0h	6h	1d	4d	0h	6h	1d	4d
	18s	20.9267	20.89	21.56	21.8667	20.9267	20.89	21.56	21.8667	20.9267	20.89	21.56	21.8667	20.9267	20.89	21.56	21.8667	20.9267	20.89	21.56	21.8667
		26.54	27.05	27.05	27.68	21.23	22.48	22.09	21.35	28.37	30.53	29.59	29.59	25.43	27.71	26.93	26.59	28.01	27.3	26.86	25.78
		26.52	27.11	27.12	27.69	21.17	22.45	22.06	21.37	28.29	30.5	29.67	29.66	25.59	27.69	27.11	26.43	28.03	27.32	26.83	25.73
		26.58	27.03	27.11	27.67	21.21	22.52	22.13	21.32	28.39	30.55	29.55	29.54	25.39	27.78	27.07	26.48	27.96	26.29	26.9	25.76
	△t	5.61333	6.16	5.49	5.81333	0.303333	1.59	0.53	-0.516667	7.44333	9.64	8.03	7.72333	4.50333	6.82	5.37	4.72333	7.08333	6.41	5.3	3.91333
		5.59333	6.22	5.56	5.82333	0.243333	1.56	0.5	-0.496667	7.36333	9.61	8.11	7.79333	4.66333	6.8	5.55	4.56333	7.10333	6.43	5.27	3.86333
		5.65333	6.14	5.55	5.80333	0.283333	1.63	0.57	-0.546667	7.46333	9.66	7.99	7.67333	4.46333	6.89	5.51	4.61333	7.03333	5.4	5.34	3.89333
	△△t	5.62				0.276667				7.42333				4.54333				7.07333
		-0.00666667	0.54	-0.13	0.193333	0.0266667	1.31333	0.253333	-0.793333	0.02	2.21667	0.606667	0.3	-0.04	2.27667	0.826667	0.18	0.01	-0.663333	-1.77333	-3.16
		-0.0266667	0.6	-0.06	0.203333	-0.0333333	1.28333	0.223333	-0.773333	-0.06	2.18667	0.686667	0.37	0.12	2.25667	1.00667	0.02	0.03	-0.643333	-1.80333	-3.21
		0.0333333	0.52	-0.07	0.183333	0.00666667	1.35333	0.293333	-0.823333	0.04	2.23667	0.566667	0.25	-0.08	2.34667	0.966667	0.07	-0.04	-1.67333	-1.73333	-3.18
	2^(-△△t)	1.00463	0.687771	1.09429	0.874583	0.981686	0.40239	0.838956	1.73307	0.986233	0.215138	0.656712	0.812252	1.02811	0.206374	0.56383	0.882703	0.993092	1.58374	3.41843	8.9383
		1.01866	0.659754	1.04247	0.868541	1.02337	0.410845	0.856584	1.70921	1.04247	0.219658	0.621288	0.773782	0.920188	0.209255	0.497695	0.986233	0.97942	1.56193	3.49026	9.25351
		0.97716	0.697372	1.04972	0.880666	0.99539	0.391387	0.816014	1.76949	0.972655	0.212176	0.675175	0.840896	1.05702	0.1966	0.511687	0.952638	1.02811	3.18951	3.32495	9.06307
	AV	1.00015	0.681632	1.06216	0.874597	1.00015	0.401541	0.837185	1.73726	1.00045	0.215657	0.651058	0.808977	1.00177	0.204076	0.524404	0.940525	1.00021	2.11173	3.41121	9.08496
	SD	0.021108	0.0195458	0.0280649	0.00606221	0.0212478	0.009757	0.0203427	0.0303548	0.0370137	0.00376814	0.027385	0.0336766	0.072118	0.00663311	0.0348536	0.0528172	0.0251147	0.933449	0.0828887	0.15874
		PgbZIP005				PgbZIP021				PgbZIP046				PgbZIP011				PgbZIP042
		0h	6h	1d	4d	0h	6h	1d	4d	0h	6h	1d	4d	0h	6h	1d	4d	0h	6h	1d	4d
	18s	20.9267	20.89	21.56	21.8667	20.9267	20.89	21.56	21.8667	20.9267	20.89	21.56	21.8667	20.9267	20.89	21.56	21.8667	20.9267	20.89	21.56	21.8667
		28.82	30.53	30.57	30.54	23.98	25.09	25.25	24.7	28.37	29.53	29.12	29.13	22.01	22.91	22.7	22.83	21.79	22.48	22.73	22.68
		28.79	30.5	30.51	30.57	23.96	25.09	25.23	24.67	28.29	29.5	29.26	29.14	21.97	22.89	22.67	22.8	21.75	22.52	22.71	22.65
		28.85	30.55	30.55	30.51	24.01	25.07	25.28	24.66	28.39	29.55	29.31	29.19	22.03	22.94	22.72	22.87	21.81	22.47	22.76	22.72
	△t	7.89333	9.64	9.01	8.67333	3.05333	4.2	3.69	2.83333	7.44333	8.64	7.56	7.26333	1.08333	2.02	1.14	0.963333	0.863333	1.59	1.17	0.813333
		7.86333	9.61	8.95	8.70333	3.03333	4.2	3.67	2.80333	7.36333	8.61	7.7	7.27333	1.04333	2	1.11	0.933333	0.823333	1.63	1.15	0.783333
		7.92333	9.66	8.99	8.64333	3.08333	4.18	3.72	2.79333	7.46333	8.66	7.75	7.32333	1.10333	2.05	1.16	1.00333	0.883333	1.58	1.2	0.853333
	△△t	7.89333				3.05667				7.42333				1.07667				0.856667
		0	1.74667	1.11667	0.78	-0.00333333	1.14333	0.633333	-0.223333	0.02	1.21667	0.136667	-0.16	0.00666667	0.943333	0.0633333	-0.113333	0.00666667	0.733333	0.313333	-0.0433333
		-0.03	1.71667	1.05667	0.81	-0.0233333	1.14333	0.613333	-0.253333	-0.06	1.18667	0.276667	-0.15	-0.0333333	0.923333	0.0333333	-0.143333	-0.0333333	0.773333	0.293333	-0.0733333
		0.03	1.76667	1.09667	0.75	0.0266667	1.12333	0.663333	-0.263333	0.04	1.23667	0.326667	-0.1	0.0266667	0.973333	0.0833333	-0.0733333	0.0266667	0.723333	0.343333	-0.00333333
	2^(-△△t)	1	0.297989	0.461158	0.582367	1.00231	0.452712	0.644685	1.16743	0.986233	0.430276	0.909618	1.11729	0.99539	0.52003	0.95705	1.08172	0.99539	0.601513	0.80478	1.03049
		1.02101	0.304251	0.480742	0.570382	1.0163	0.452712	0.653685	1.19196	1.04247	0.439317	0.825496	1.10957	1.02337	0.527289	0.97716	1.10445	1.02337	0.585064	0.816014	1.05214
		0.97942	0.293887	0.467596	0.594604	0.981686	0.459032	0.631418	1.20025	0.972655	0.424352	0.797377	1.07177	0.981686	0.509328	0.943874	1.05214	0.981686	0.605696	0.788218	1.00231
	AV	1.00014	0.298709	0.469832	0.582451	1.0001	0.454819	0.643263	1.18654	1.00045	0.431315	0.844164	1.09954	1.00015	0.518882	0.959362	1.07944	1.00015	0.597424	0.803004	1.02832
	SD	0.0207963	0.00521929	0.00998138	0.0121111	0.0174152	0.00364864	0.0112014	0.0170669	0.0370137	0.00753629	0.058403	0.0243571	0.0212478	0.00903553	0.0167628	0.0262292	0.0212478	0.0109068	0.0139831	0.024987
